# Supplementary material for: Arachidonic acid induction of Rho-mediated transendothelial migration in prostate cancer
Source: PubMed Central journal article supplement — Br J Cancer. 2014 Mar 4;110(8):2099–108. doi: 10.1038/bjc.2014.99 (PMC3992515; doi:10.1038/bjc.2014.99), 2014-03-04

# Supplementary figure 1

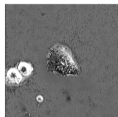

0 min

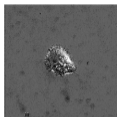

5 min

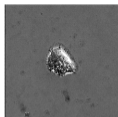

10 min

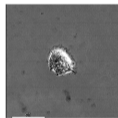

15 min

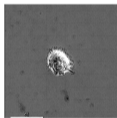

20 min

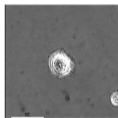

30 min

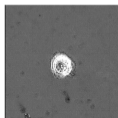

40 min

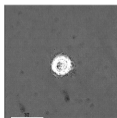

60 min

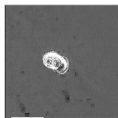

90 min

# Supplementary figure 2

## A

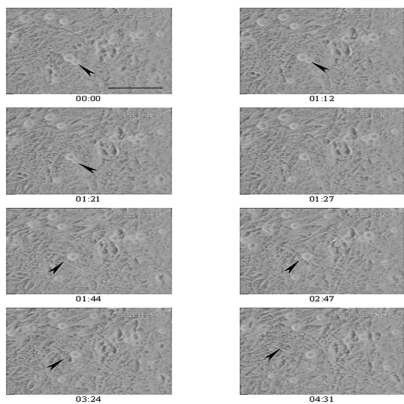

## B

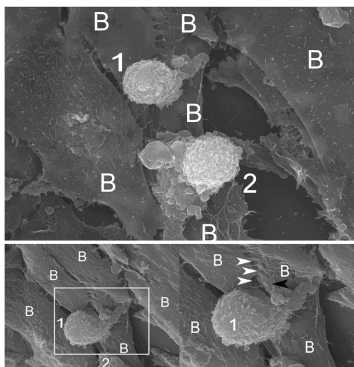

## C

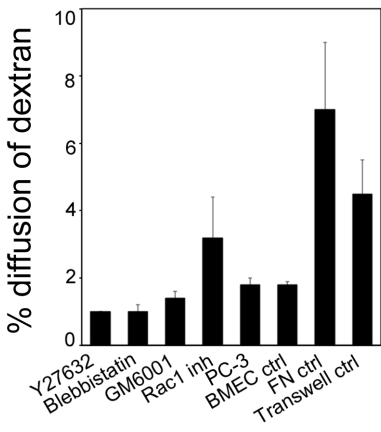

### Supplementary figure 3

**A**

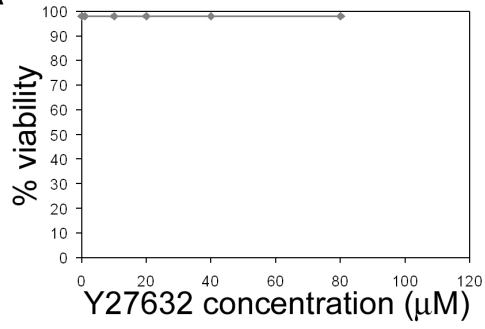

**B**

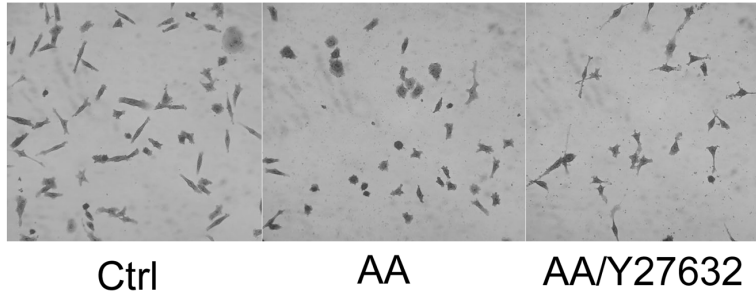

Ctrl

AA

AA/Y27632

**C**

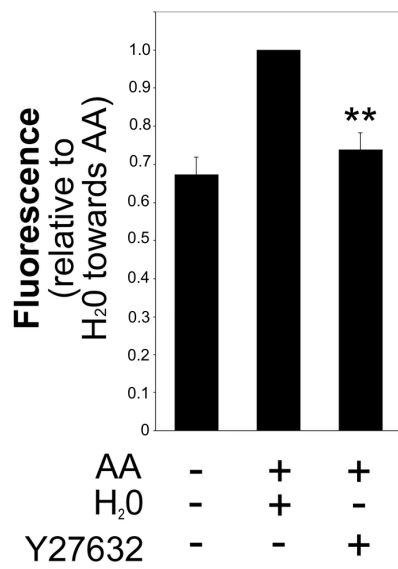

|                  |   |   |   |
|------------------|---|---|---|
| AA               | - | + | + |
| H <sub>2</sub> O | - | + | - |
| Y27632           | - | - | + |

**D**

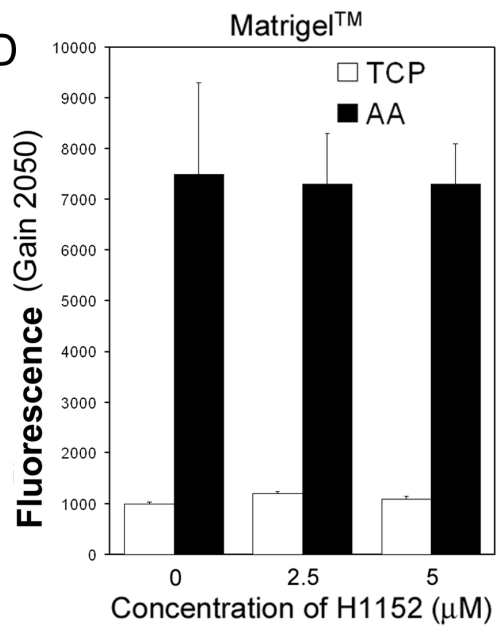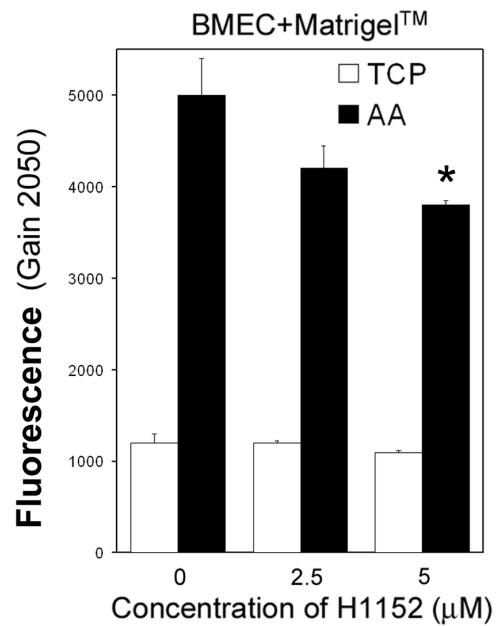



# supplementary figure 5

No AA

AA

NT

siRhoA

siRhoC

siROCK1

siROCK2

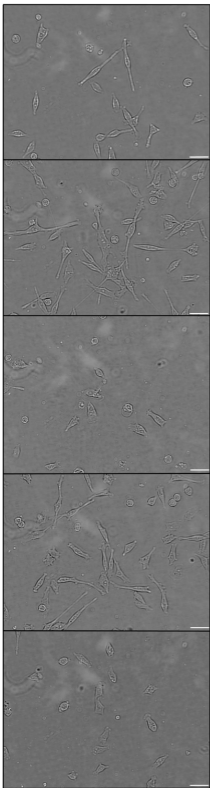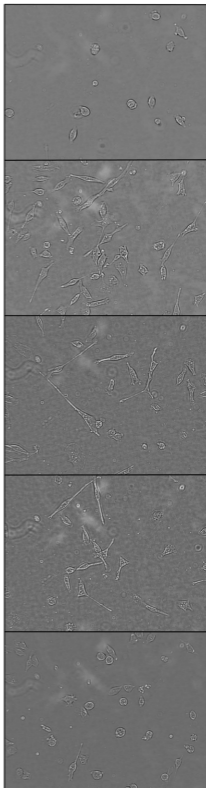

# Supplementary Figure 6

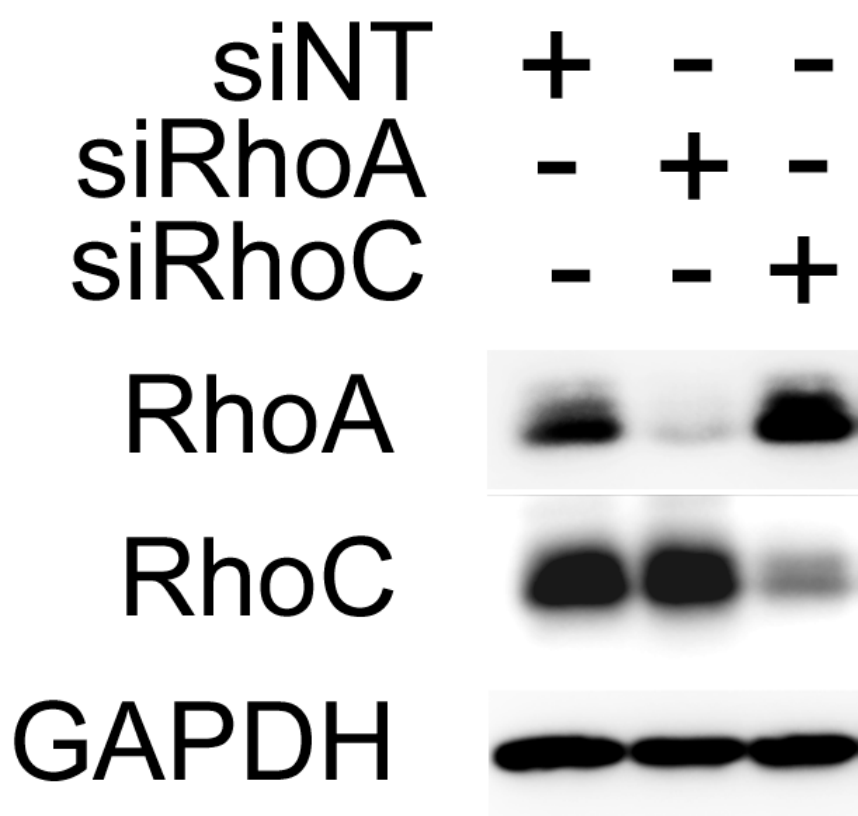

Supplement: bjc201499x1.pdf [file bjc201499x1.pdf]
